# Supplementary material for: A Survey of African American Physicians on the Health Effects of Climate Change
Source: Int J Environ Res Public Health. 2014 Nov 28;11(12):12473–85. doi: 10.3390/ijerph111212473 (PMC4276625; doi:10.3390/ijerph111212473)
Supplement: Supplementary File 1 [file ijerph-11-12473-s001.pdf]

## A Survey of African American Physicians on the Health Effects of Climate Change

### Section A

Climate change refers to the idea that the world's average temperature has been increasing over the past 150 years, may be increasing more in the future, and that the world's climate is changing as a result.

What do you think: Do you think that climate change is happening?

(Those that answered YES were then asked) How sure are you that climate change is happening?

(Those that answered NO were then asked) How sure are you that climate change is not happening?

| Response Options  | Percent Response | Response Number (N) |
|-------------------|------------------|---------------------|
| <b>Yes</b>        | <b>97%</b>       | <b>271</b>          |
| Extremely Sure    | 31%              | 93                  |
| Very Sure         | 35%              | 107                 |
| Somewhat Sure     | 20%              | 59                  |
| Not at all Sure   | 2%               | 5                   |
| <b>Don't Know</b> | <b>2%</b>        | <b>5</b>            |
| <b>No</b>         | <b>1%</b>        | <b>3</b>            |
| Not at all Sure   | 0.7%             | 2                   |
| Somewhat Sure     | 0%               | 0                   |
| Very Sure         | 0%               | 0                   |
| Extremely Sure    | 0.3%             | 1                   |
| <b>Total</b>      | <b>100%</b>      | <b>279</b>          |

Do you think climate change over the past 150 years is...

| Response Options                                                                | Percent Response | Response Number (N) |
|---------------------------------------------------------------------------------|------------------|---------------------|
| Caused entirely by human activities                                             | 4%               | 10                  |
| Caused mostly by human activities                                               | 58%              | 161                 |
| Caused about equally by human activities and natural changes in the environment | 34%              | 96                  |
| Caused mostly by natural changes in the environment                             | 3%               | 8                   |
| Caused entirely by natural changes in the environment                           | 1%               | 2                   |
| None of the above because climate change isn't happening                        | 0.5%             | 1                   |
| <b>Total</b>                                                                    | <b>100%</b>      | <b>278</b>          |

To the best of your knowledge, what percentage of climate scientists has concluded that human-caused climate change is occurring?

| Response Options | Percent Response | Response Number (N) |
|------------------|------------------|---------------------|
| 0–20%            | 2%               | 6                   |
| 21%–40%          | 12%              | 33                  |
| 41%–60%          | 17%              | 46                  |

|              |             |            |
|--------------|-------------|------------|
| 61%–80%      | 24%         | 67         |
| 81%–100%     | 29%         | 81         |
| Don't Know   | 17%         | 46         |
| <b>Total</b> | <b>100%</b> | <b>279</b> |

How knowledgeable do you feel about the association between climate change and health impacts?

| Response Options         | Percent Response | Response Number (N) |
|--------------------------|------------------|---------------------|
| Very knowledgeable       | 6%               | 16                  |
| Moderately knowledgeable | 18%              | 51                  |
| Modestly knowledgeable   | 48%              | 132                 |
| Not at all knowledgeable | 28%              | 79                  |
| <b>Total</b>             | <b>100%</b>      | <b>278</b>          |

How much, if at all, do you think climate change has harmed people in your city or county over the past decade?

| Response Options  | Percent Response | Response Number (N) |
|-------------------|------------------|---------------------|
| A great deal      | 20%              | 56                  |
| A moderate amount | 46%              | 129                 |
| Only a little     | 20%              | 56                  |
| Not at all        | 2%               | 5                   |
| Don't know        | 12%              | 32                  |
| <b>Total</b>      | <b>100%</b>      | <b>278</b>          |

## Section B

How much, if at all, do you think climate change is relevant to direct patient care?

| Response Options  | Percent Response | Response Number (N) |
|-------------------|------------------|---------------------|
| A great deal      | 24%              | 67                  |
| A moderate amount | 42%              | 116                 |
| Only a little     | 22%              | 61                  |
| Not at all        | 4%               | 11                  |
| Don't know        | 8%               | 21                  |
| <b>Total</b>      | <b>100%</b>      | <b>276</b>          |

How much, if at all, do you think climate change is affecting the health of your patients?

| Response Options               | Percent Response | Response Number (N) |
|--------------------------------|------------------|---------------------|
| A great deal                   | 18%              | 49                  |
| A moderate amount              | 43%              | 118                 |
| Only a little                  | 18%              | 50                  |
| Not at all                     | 3%               | 8                   |
| Don't know                     | 10%              | 28                  |
| I don't currently see patients | 8%               | 23                  |
| <b>Total</b>                   | <b>100%</b>      | <b>276</b>          |

Those who indicated that they did not currently see patients were skipped ahead to Question C3: “My primary place of work does an effective job minimizing its use of fossil-fuels (e.g., conserving energy/water, recycling equipment, *etc.*)”.

In which of the following ways, if any, do you think your patients are currently being affected by climate change, or might be affected in the next 10–20 years? The percentage responses for each question are based on the number of individuals who answered each question.

| Response Options                                                                                                                        | Percent Response |            |     | Response Number (N) |
|-----------------------------------------------------------------------------------------------------------------------------------------|------------------|------------|-----|---------------------|
|                                                                                                                                         | Yes              | Don't Know | No  | Total               |
| <b>People Are Currently Being Affected</b>                                                                                              |                  |            |     |                     |
| Heat-related effects (e.g., heatstroke, heat exhaustion, cardio-respiratory illness)                                                    | 75%              | 14%        | 11% | 236                 |
| Vectorborne infection (e.g., Lyme, West Nile, Dengue Fever, Malaria)                                                                    | 58%              | 26%        | 16% | 232                 |
| Diarrhea from food/waterborne illnesses ( e.g., Salmonella, Giardia, Cryptosporidia) following downpours or floods                      | 56%              | 22%        | 22% | 238                 |
| Injuries due to severe storms, floods, droughts, fires                                                                                  | 88%              | 8%         | 5%  | 240                 |
| Air pollution related increases in severity of illness (e.g., asthma, COPD, pneumonia, cardiovascular disease)                          | 88%              | 10%        | 3%  | 242                 |
| Increased care for allergic sensitization and symptoms of exposure to plants or mold (visits to office/ER for asthma/allergic symptoms) | 80%              | 13%        | 8%  | 240                 |
| Mental health problems due to the above                                                                                                 | 40%              | 41%        | 19% | 235                 |
| <b>People Will Be Affected in the Next 10–20 Years</b>                                                                                  |                  |            |     |                     |
| Heat-related effects (e.g., heatstroke, heat exhaustion, cardio-respiratory illness)                                                    | 88%              | 9%         | 3%  | 221                 |
| Vectorborne infection (e.g., Lyme, West Nile, Dengue Fever, Malaria)                                                                    | 70%              | 21%        | 9%  | 222                 |
| Diarrhea from food/waterborne illnesses ( e.g., Salmonella, Giardia, Cryptosporidia) following downpours or floods                      | 67%              | 23%        | 10% | 222                 |
| Injuries due to severe storms, floods, droughts, fires                                                                                  | 90%              | 9%         | 1%  | 219                 |
| Air pollution related increases in severity of illness (e.g., asthma, COPD, pneumonia, cardiovascular disease)                          | 91%              | 8%         | 2%  | 221                 |
| Increased care for allergic sensitization and symptoms of exposure to plants/mold (office/ER visits for asthma/allergy)                 | 86%              | 11%        | 4%  | 222                 |
| Mental health problems due to the above                                                                                                 | 56%              | 35%        | 9%  | 225                 |

## Section C

Which of the following, if any, are barriers that prevent you from addressing climate change-related health issues with patients?

| Response Options                                                                                        | Percent Response |       |         |          |                   | Response Number (N) |
|---------------------------------------------------------------------------------------------------------|------------------|-------|---------|----------|-------------------|---------------------|
|                                                                                                         | Strongly Agree   | Agree | Neutral | Disagree | Strongly Disagree | Total               |
| Climate change is not occurring                                                                         | 1%               | 4%    | 9%      | 29%      | 57%               | 164                 |
| My patients would not be interested or knowledgeable enough about climate impacts to discuss this issue | 6%               | 21%   | 33%     | 33%      | 7%                | 238                 |
| Lack of time                                                                                            | 27%              | 42%   | 18%     | 9%       | 4%                | 239                 |
| Lack of knowledge regarding how to approach the issue with my patients                                  | 26%              | 45%   | 14%     | 10%      | 5%                | 240                 |
| Addressing these issues with my patients will not make much difference in their overall health          | 5%               | 17%   | 27%     | 40%      | 11%               | 240                 |
| This is not a billable activity                                                                         | 16%              | 23%   | 30%     | 15%      | 16%               | 164                 |
| Other barriers (please specify)                                                                         | 15%              | 15%   | 58%     | 4%       | 9%                | 55                  |

The primary hospital that I admit to is well prepared for climate-related events (e.g., disasters/emergencies, extreme weather events, increase in certain diseases, *etc.*).

| Response Options  | Percent Response | Response Number (N) |
|-------------------|------------------|---------------------|
| Strongly agree    | 15%              | 34                  |
| Agree             | 35%              | 82                  |
| Neutral           | 30%              | 71                  |
| Disagree          | 15%              | 36                  |
| Strongly disagree | 5%               | 12                  |
| <b>Total</b>      | <b>100%</b>      | <b>235</b>          |

My primary place of work does an effective job minimizing its use of fossil-fuels (e.g., conserving energy/water, recycling equipment, *etc.*).

| Response Options  | Percent Response | Response Number (N) |
|-------------------|------------------|---------------------|
| Strongly agree    | 6%               | 16                  |
| Agree             | 23%              | 58                  |
| Neutral           | 30%              | 77                  |
| Disagree          | 34%              | 88                  |
| Strongly disagree | 7%               | 17                  |
| <b>Total</b>      | <b>100%</b>      | <b>256</b>          |

Teaching about climate change and its association with health impacts should be integrated into medical education.

| Response Options  | Percent Response | Response Number (N) |
|-------------------|------------------|---------------------|
| Strongly agree    | 30%              | 78                  |
| Agree             | 50%              | 129                 |
| Neutral           | 12%              | 31                  |
| Disagree          | 5%               | 14                  |
| Strongly disagree | 3%               | 8                   |
| <b>Total</b>      | <b>100%</b>      | <b>260</b>          |

My medical societies should have a significant advocacy role in relation to climate change and health.

| Response Options  | Percent Response | Response Number (N) |
|-------------------|------------------|---------------------|
| Strongly agree    | 28%              | 71                  |
| Agree             | 48%              | 125                 |
| Neutral           | 19%              | 48                  |
| Disagree          | 5%               | 12                  |
| Strongly disagree | 1%               | 2                   |
| <b>Total</b>      | <b>100%</b>      | <b>258</b>          |

I feel that actions I take in my personal and/or professional life can contribute to effective action on climate change.

| Response Options  | Percent Response | Response Number (N) |
|-------------------|------------------|---------------------|
| Strongly agree    | 25%              | 65                  |
| Agree             | 53%              | 137                 |
| Neutral           | 17%              | 43                  |
| Disagree          | 6%               | 15                  |
| Strongly disagree | 0%               | 0                   |
| <b>Total</b>      | <b>100%</b>      | <b>260</b>          |

Physicians have a responsibility to bring the health effects of climate change to the attention of their patients.

| Response Options  | Percent Response | Response Number (N) |
|-------------------|------------------|---------------------|
| Strongly agree    | 24%              | 63                  |
| Agree             | 51%              | 132                 |
| Neutral           | 20%              | 53                  |
| Disagree          | 5%               | 13                  |
| Strongly disagree | 0%               | 0                   |
| <b>Total</b>      | <b>100%</b>      | <b>261</b>          |

Physicians have a responsibility to bring the health effects of climate change to the attention of the public. This question was only asked on the member survey and not on the leadership survey.

| Response Options  | Percent Response | Response Number (N) |
|-------------------|------------------|---------------------|
| Strongly agree    | 25%              | 43                  |
| Agree             | 46%              | 78                  |
| Neutral           | 23%              | 39                  |
| Disagree          | 5%               | 9                   |
| Strongly disagree | 0.5%             | 1                   |
| <b>Total</b>      | <b>100%</b>      | <b>170</b>          |

Physicians should have a leadership role in encouraging offices, clinics, hospitals to be as environmentally sustainable as possible.

| Response Options  | Percent Response | Response Number (N) |
|-------------------|------------------|---------------------|
| Strongly agree    | 34%              | 88                  |
| Agree             | 47%              | 121                 |
| Neutral           | 16%              | 42                  |
| Disagree          | 3%               | 8                   |
| Strongly disagree | 0.5%             | 1                   |
| <b>Total</b>      | <b>100%</b>      | <b>260</b>          |

Which of the following resources, if any, would be helpful to you?

Policy statements provided by my professional associations.

| Response Options  | Percent Response | Response Number (N) |
|-------------------|------------------|---------------------|
| Strongly agree    | 34%              | 89                  |
| Agree             | 48%              | 127                 |
| Neutral           | 14%              | 37                  |
| Disagree          | 3%               | 8                   |
| Strongly disagree | 2%               | 5                   |
| <b>Total</b>      | <b>100%</b>      | <b>266</b>          |

Which of the following resources, if any, would be helpful to you?

Continuing medical education (CME) on climate change and health.

| Response Options  | Percent Response | Response Number (N) |
|-------------------|------------------|---------------------|
| Strongly agree    | 41%              | 110                 |
| Agree             | 48%              | 127                 |
| Neutral           | 8%               | 21                  |
| Disagree          | 3%               | 7                   |
| Strongly disagree | 0.5%             | 1                   |
| <b>Total</b>      | <b>100%</b>      | <b>266</b>          |

Which of the following resources, if any, would be helpful to you?

Patient education materials.

| Response Options  | Percent Response | Response Number (N) |
|-------------------|------------------|---------------------|
| Strongly agree    | 41%              | 109                 |
| Agree             | 45%              | 119                 |
| Neutral           | 11%              | 30                  |
| Disagree          | 3%               | 7                   |
| Strongly disagree | 0.5%             | 1                   |
| <b>Total</b>      | <b>100%</b>      | <b>266</b>          |

Which, if any, of the following groups will disproportionately experience any negative health effects from climate change? (check all that apply).

| Response Options                             | Percent Response |     | Response Number (N) |
|----------------------------------------------|------------------|-----|---------------------|
|                                              | Yes              | No  | Total               |
| Young children ages 0 to 4                   | 83%              | 17% | 271                 |
| Older children ages 5 to 17                  | 42%              | 58% | 271                 |
| Young adults ages 18 to 39                   | 27%              | 73% | 271                 |
| Middle aged adults ages 40 to 60             | 25%              | 75% | 271                 |
| Older adults ages 60+                        | 80%              | 20% | 271                 |
| People with chronic diseases                 | 88%              | 12% | 271                 |
| People living near or below the poverty line | 86%              | 14% | 271                 |
| People of color                              | 73%              | 27% | 271                 |

#### Section D

Outside your role as a health professional, to what degree have you personally experienced climate change?

| Response Options  | Percent Response | Response Number (N) |
|-------------------|------------------|---------------------|
| A great deal      | 10%              | 27                  |
| A moderate amount | 38%              | 100                 |
| Only a little     | 40%              | 107                 |
| Not at all        | 6%               | 15                  |
| Don't know        | 7%               | 18                  |
| <b>Total</b>      | <b>100%</b>      | <b>267</b>          |

How big of an effort should the U.S. make to reduce the potential impacts of climate change (prevention)?

| Response Options                                              | Percent Response | Response Number (N) |
|---------------------------------------------------------------|------------------|---------------------|
| A large-scale effort, even if it has large economic costs     | 55%              | 146                 |
| A medium-scale effort, even if it has moderate economic costs | 38%              | 100                 |
| A small-scale effort, even if it has small economic costs     | 7%               | 18                  |
| No effort                                                     | 1%               | 3                   |
| <b>Total</b>                                                  | <b>100%</b>      | <b>267</b>          |

How big of an effort should the U.S. make to protect people from the potential harmful health effects caused by climate change (preparedness)?

| Response Options                                              | Percent Response | Response Number (N) |
|---------------------------------------------------------------|------------------|---------------------|
| A large-scale effort, even if it has large economic costs     | 56%              | 149                 |
| A medium-scale effort, even if it has moderate economic costs | 37%              | 98                  |
| A small-scale effort, even if it has small economic costs     | 7%               | 19                  |
| No effort                                                     | 1%               | 2                   |
| <b>Total</b>                                                  | <b>100%</b>      | <b>268</b>          |

## Section E

What is your primary work setting?

| Response Options            | Percent Response | Response Number (N) |
|-----------------------------|------------------|---------------------|
| Outpatient (clinical)       | 49%              | 126                 |
| Hospital (clinical)         | 29%              | 74                  |
| Non-clinical Administrative | 8%               | 20                  |
| Other clinical              | 8%               | 21                  |
| Other non-clinical          | 6%               | 16                  |
| Retired                     | 0.5%             | 1                   |
| <b>Total</b>                | <b>100%</b>      | <b>258</b>          |

Which is, or if retired was, your primary work location?

| Response Options | Percent Response | Response Number (N) |
|------------------|------------------|---------------------|
| Urban            | 69%              | 167                 |
| Suburban         | 22%              | 52                  |
| Rural            | 5%               | 12                  |
| Multiple         | 4%               | 10                  |
| <b>Total</b>     | <b>100%</b>      | <b>241</b>          |

In which U.S. State do you (or did you) work?

| Response Options     | Percent Response | Response Number (N) |
|----------------------|------------------|---------------------|
| Alabama              | 1%               | 3                   |
| Arizona              | 1%               | 2                   |
| California           | 8%               | 20                  |
| Colorado             | 1%               | 3                   |
| Connecticut          | 0.5%             | 1                   |
| Delaware             | 1%               | 2                   |
| District of Columbia | 6%               | 14                  |
| Florida              | 4%               | 10                  |
| Georgia              | 10%              | 26                  |
| Hawaii               | 0.5%             | 1                   |
| Illinois             | 3%               | 7                   |
| Indiana              | 2%               | 5                   |
| Kansas               | 0.5%             | 1                   |
| Kentucky             | 0.5%             | 1                   |
| Louisiana            | 4%               | 9                   |

|                |             |            |
|----------------|-------------|------------|
| Maryland       | 10%         | 24         |
| Massachusetts  | 4%          | 9          |
| Michigan       | 3%          | 8          |
| Minnesota      | 1%          | 2          |
| Mississippi    | 1%          | 2          |
| Missouri       | 3%          | 8          |
| Nevada         | 1%          | 3          |
| New Jersey     | 2%          | 5          |
| New Mexico     | 0.5%        | 1          |
| New York       | 7%          | 18         |
| North Carolina | 4%          | 9          |
| Ohio           | 4%          | 9          |
| Pennsylvania   | 2%          | 6          |
| South Carolina | 0.5%        | 1          |
| Tennessee      | 3%          | 7          |
| Texas          | 7%          | 17         |
| Virginia       | 4%          | 9          |
| Wisconsin      | 2%          | 6          |
| <b>Total</b>   | <b>100%</b> | <b>249</b> |

Which of the following degrees or certifications do you hold? (check all that apply).

| <b>Response Options</b>   | <b>Percent Response</b> | <b>Response Number (N)</b> |
|---------------------------|-------------------------|----------------------------|
| M.D.                      | 81%                     | 215                        |
| Ph. D.                    | 2%                      | 4                          |
| PA/CRNP                   | 0.5%                    | 1                          |
| Master's Degree           | 1%                      | 2                          |
| Other clinical degree     | 1%                      | 3                          |
| Other non-clinical degree | 2%                      | 4                          |
| RN                        | 0.5%                    | 1                          |
| Multiple degrees          | 13%                     | 35                         |
| <b>Total</b>              | <b>100%</b>             | <b>265</b>                 |

33 out of 35 respondents who hold multiple degrees indicated that one of the degrees was an M.D.

Which best describes your medical training?

| <b>Response Options</b>           | <b>Percent Response</b> | <b>Response Number (N)</b> |
|-----------------------------------|-------------------------|----------------------------|
| Internal Medicine/Family Medicine | 29%                     | 74                         |
| Pediatrics                        | 14%                     | 36                         |
| OB/Gyn                            | 11%                     | 28                         |
| Surgery                           | 5%                      | 12                         |
| Other Specialty                   | 28%                     | 71                         |
| Other Practice                    | 4%                      | 9                          |
| Multiple                          | 10%                     | 26                         |
| <b>Total</b>                      | <b>100%</b>             | <b>256</b>                 |

If you are in clinical practice, what proportion of your patient population is non-white?

| Response Options | Percent Response | Response Number (N) |
|------------------|------------------|---------------------|
| Less than 25%    | 21%              | 49                  |
| 26%–50%          | 26%              | 60                  |
| 51%–75%          | 21%              | 49                  |
| More than 75%    | 31%              | 71                  |
| <b>Total</b>     | <b>100%</b>      | <b>229</b>          |

If you are in clinical practice, what proportion of your patient population is covered by the following insurance arrangements?

| Response Options | Percent Response |               | Response Number (N) |
|------------------|------------------|---------------|---------------------|
|                  | Less than 50%    | More than 50% | TOTAL               |
| Self-Pay         | 99%              | 1%            | 126                 |
| Medicare         | 83%              | 17%           | 134                 |
| Medicaid         | 76%              | 24%           | 137                 |
| Private          | 72%              | 29%           | 137                 |
| Other            | 68%              | 32%           | 25                  |

What is your gender?

| Response Options     | Percent Response | Response Number (N) |
|----------------------|------------------|---------------------|
| Female               | 62%              | 163                 |
| Male                 | 40%              | 97                  |
| Female and Male      | 0.5%             | 1                   |
| Prefer not to answer | 1%               | 2                   |
| <b>Total</b>         | <b>100%</b>      | <b>263</b>          |

What is your age?

| Response Options | Percent Response | Response Number (N) |
|------------------|------------------|---------------------|
| 18–30            | 5%               | 14                  |
| 31–50            | 38%              | 100                 |
| 51–65            | 43%              | 111                 |
| 66 or older      | 14%              | 36                  |
| <b>Total</b>     | <b>100%</b>      | <b>261</b>          |

Please specify your ethnicity:

| Response Options         | Percent Response | Response Number (N) |
|--------------------------|------------------|---------------------|
| Hispanic or Latino/a     | 1%               | 3                   |
| Not Hispanic or Latino/a | 99%              | 252                 |
| <b>Total</b>             | <b>100%</b>      | <b>255</b>          |

Please specify your race (check all that apply):

| Response Options                          | Percent Response | Response Number (N) |
|-------------------------------------------|------------------|---------------------|
| American Indian or Alaskan Native         | 1%               | 3                   |
| Asian                                     | 0%               | 0                   |
| Black or African American                 | 95%              | 250                 |
| Native Hawaiian or other Pacific Islander | 0%               | 0                   |
| White                                     | 0%               | 0                   |
| Multiple/Bi-racial                        | 3%               | 9                   |
| <b>Total</b>                              | <b>100%</b>      | <b>262</b>          |

Would you like to assist in education or advocacy focused on climate and health in your community? (This question requested that the individual leave his/her name on a separate page.)

| Response Options | Percent Response | Response Number (N) |
|------------------|------------------|---------------------|
| Yes              | 33%              | 85                  |
| No               | 67%              | 172                 |
| <b>Total</b>     | <b>100%</b>      | <b>257</b>          |

Survey Group (not a response option).

| Response Options             | Percent Response | Response Number (N) |
|------------------------------|------------------|---------------------|
| Leadership Survey March 2014 | 36%              | 101                 |
| Member Survey May 2014       | 64%              | 183                 |
| <b>Total</b>                 | <b>100%</b>      | <b>284</b>          |

© 2014 by the authors; licensee MDPI, Basel, Switzerland. This article is an open access article distributed under the terms and conditions of the Creative Commons Attribution license (<http://creativecommons.org/licenses/by/4.0/>).
